1 **Analysis of the Genetic Structure and Diversity of Upland**  
2 **Cotton Groups in Different Planting Areas Based on SNP**  
3 **Markers**

4 Jungduo Wang<sup>1§</sup>, Zeliang Zhang<sup>1,2,§</sup>, Zhaolong Gong<sup>1,§</sup>, Yajun Liang<sup>1</sup>, Xiantao  
5 Ai<sup>1</sup>, Zhiwei Sang<sup>2</sup>, Jiangping Guo<sup>1</sup>, Xueyuan Li<sup>1\*</sup>, Juyun Zheng<sup>1\*</sup>

6 Affiliations<sup>1</sup> Cash Crops Research Institute of Xinjiang Academy of Agricultural Science  
7 (XAAS), Urumqi 830001, Xinjiang, P. R. China; <sup>2</sup>Engineering Research Centre of Cotton,  
8 Ministry of Education/College of Agriculture, Xinjiang Agricultural University, 311 Nongda  
9 East Road, Urumqi, 830052

10 § These authors have contributed equally to this work

11 \* Corresponding author: xjmh2338@163.com, zjypp8866@126.com

12 **Abstract:** Genetic diversity, kinship and population genetic structure analyses of  
13 *Gossypium hirsutum* germplasm can provide a better understanding of the origin and  
14 evolution of *G. hirsutum* biodiversity. In this study, 1313331 SNP molecular markers  
15 were used to construct a phylogenetic tree of each sample using MEGAX, to perform  
16 population structure analysis by ADMIXTURE software and principal component  
17 analysis (PCA) by EIGENSOFT software, and to estimate relatedness using SPAGeDi.  
18 ADMIXTURE software divided the experimental cotton population into 16 subgroups,  
19 and the *Gossypium hirsutum* samples could be roughly clustered according to source  
20 place, but there were some overlapping characteristics among samples. The  
21 experimental cotton population was divided into six groups according to source to  
22 calculate the genetic diversity index ( $H$ ), and the obtained value (0.306) was close to  
23 that for germplasm collected by others in China. Cluster 4 had a relatively high  
24 genetic diversity level (0.390). The degrees of genetic differentiation within the  
25 experimental cotton population groups were low (the population differentiation  
26 indexes ranged from 0.02368 to 0.10664). The genetic distance among cotton

27 accessions varied from 0.000332651 to 0.562664014, with an average of 0.25240429.  
28 The results of this study may provide a basis for mining elite alleles and using them  
29 for subsequent association analysis.

30 **Keywords:** *Gossypium hirsutum*; SNP marker; Genetic structure; Genetic diversity

## 31 **Introduction**

32 Cotton is one of the most important economic crops and a significant component of  
33 Chinese economy; moreover, it is widely cultivated worldwide and has a long history.  
34 It is the main textile material in the global textile industry, accounting for more than  
35 60% of raw domestic textile materials and more than 50% of the total sales of  
36 fiber-based products in international consumer markets. Cotton is the foremost source  
37 of natural fiber, and cottonseed oil is considered a very-good-quality dietary fiber oil  
38 that accounts for approximately 10% of the global production of animal and plant oils.  
39 Cotton kernels are rich in protein and an important source of protein for humans;  
40 kernel powder from low-phenol cotton is also used as a major additive in high-grade  
41 foods. Cotton stalks can act as combustion materials and, after crushing, can provide  
42 crude feed for the livestock industry and can be used as feedstock in some industrial  
43 aspects (Liu.2015). With the increase in textile industrial development and  
44 improvements in the scientific and mechanistic levels of crop cultivation in China, the  
45 country has gradually become the largest cotton producer in the world, as well as the  
46 largest cotton consumer, with an annual planting of up to 80 million mu, providing the  
47 motivation for economic development and to meet the needs of the people.

48 In accordance with its botanical classification, cotton is a dicotyledon that  
49 belongs to the clade Angiospermae, order Malvales, family Malvaceae, and genus  
50 *Gossypium*. Beasley divided diploid cotton species into five groups, a to e, based on  
51 kinship and local environmental conditions, to lay a foundation for subsequent studies  
52 on the classification of cotton species (Beasley *et al.*1940). In 1978, Fryxell (1979)  
53 divided the genus *Gossypium* into four cultivated species and 39 other wild species

54 based on previous works, and this classification remained partially controversial, even  
55 though it was mostly recognized. Afterwards, Fryxell (1992) summarized the genus  
56 *Gossypium* into 50 species. A few years ago, botanists again discovered two new  
57 tetraploid cotton species, *G. ekmanianumsi* and *G. stephensi* (Grover *et al.*  
58 2015;Gallagher *et al.*2017). Currently, the genus *Gossypium* can be divided into a  
59 total of 52 species, including seven allotetraploid species and 45 diploid species.

60 At present, some researchers use sequence-related amplified polymorphisms  
61 (SRAPs), simple sequence repeats (SSRs), amplified fragment length polymorphisms  
62 (AFLPs), single-nucleotide polymorphisms (SNPs) and other molecular markers to  
63 study cotton genetic diversity. Dong (2007) used SSR markers to evaluate the  
64 diversity of 96 germplasm resources of upland cotton, sea island cotton, Asian cotton  
65 and grass cotton and found that the main phenotypic traits of cotton were significantly  
66 different between germplasms and within species. An extremely significant finding  
67 was that the phenotypic diversity index of upland cotton germplasm was the highest.  
68 Wu *et al.* (2001) studied 36 varieties using ISSR ( inter-simple sequence repeat )  
69 technology and showed that the hereditary basis of upland cotton cultivars is  
70 relatively narrow. Liu *et al.* (2003) used RAPD marker technology to analyze the  
71 genetic diversity of 166 representative cotton varieties (or lines) in China since the  
72 founding of the People's Republic and showed that the genetic range of selfing upland  
73 cotton varieties in China was narrower than that of imported varieties. The hereditary  
74 basis of hybrid upland cotton is narrower than that of the conventional variety; that of  
75 the upland cotton varieties generated after the 1980s is narrower than that of the  
76 varieties from the 1970s; that of the Yangtze River cotton varieties is narrower than  
77 that of the Huanghuai cotton varieties; and that of the northwest inland cotton  
78 varieties is narrower than that of the Yangtze River cotton varieties. Multani *et al.*  
79 (1995) used RAPD technology to analyze 14 Australian cotton varieties and found  
80 that their genetic relationships were relatively close. Cotton also shows a certain  
81 degree of differentiation at the molecular level. Gao *et al.* (2010) used SSR  
82 technology to analyze the genetic diversity of tetraploid cotton species in China. The

83 results showed that wild lines of broad-leaved cotton and upland cotton have the  
84 closest genetic relationship, and the genetic relationship between Darwin cotton and  
85 sea island cotton was very close. Brown cotton was also relatively closely related to  
86 these types of cotton. Wu (2012) analyzed the diversity of 168 sea island cotton  
87 samples by morphological observation combined with SRAP technology, which  
88 showed that the genetic basis of Chinese sea island cotton is narrow and that the level  
89 of diversity is low. Kuang *et al.* (2011) used 36 pairs of primers with high  
90 polymorphism to analyze the genetic diversity of 32 main cultivated varieties selected  
91 in 2008 in China. Through cluster analysis, they found that the genetic differences  
92 among cotton varieties in the Yangtze River Basin were the largest, the differences in  
93 the Xinjiang cotton area were the second largest, and the differences in the Yellow  
94 River basin were the smallest. The genetic diversity of hybrids is richer than that of  
95 conventional species. Chen *et al.* (2006) analyzed the diversity of 43 upland cotton  
96 basic germplasms in China and found that their genetic diversity level showed a  
97 downward trend, and the diversity level of cotton areas in the Yangtze River and  
98 Yellow River basins was lower than that of foreign areas where basic germplasms are  
99 grown. Thus, the genetic backgrounds of the breeds are relatively narrow.

100 Population genetics is a discipline in which mathematical and statistical methods  
101 are applied to study gene and genotype frequencies in populations and the effects of  
102 selection and mutations that influence these frequencies in order to study the  
103 relationships of processes such as migration and genetic drift with genetic structure,  
104 thereby exploring evolution. Analysis of genetic differences using molecular markers  
105 is an essential approach in population genetics. Population genetics studies are often  
106 performed by using SNP markers.

107 Before performing GWAS analysis, clarifying the genetic background and  
108 population structure of the tested material is fundamental. Therefore, the work carried  
109 out in this paper will lay a foundation for further association analysis.

## 111 1 Materials and methods

### 112 1.1 Experimental materials

113 This study used 273 domestic and foreign resources of upland cotton varieties  
114 (Appendix 1) as research materials, and all materials were provided by the Economic  
115 Crop Research Institute of the Xinjiang Academy of Agricultural Sciences. Middle  
116 intact leaves were collected from individual plants grown in the field.

### 117 1.2 Extraction and sequencing of cotton DNA

118 The genomic DNA of cotton leaves was extracted by the modified CTAB method and  
119 then tested. Enzymatic 3' A processing, attachment of a dual-index (Kozich *et al.*2013)  
120 sequencing adapter, PCR amplification, purification, mixing, and sequencing on an  
121 Illumina sequencing platform were performed. Japanese rice was used as a  
122 sequencing control to evaluate the accuracy of the enzymatic experiment. The  
123 dual-index adapter was used to identify the original data obtained by sequencing and  
124 obtain the reads from each sample. After filtering the adapters from the sequencing  
125 reads, sequencing quality and data volume assessments were performed. The  
126 digestion efficiency of HaeIII+SspI-HF® was evaluated through Nipponbare rice data  
127 to judge the accuracy and effectiveness of the experimental process.

### 128 1.3 Development of cotton snp markers

129 The sequenced reads obtained by simplified sequencing needed to be realigned to the  
130 reference genome to perform subsequent variation analysis. Using Zhejiang  
131 University Cotton v2.1  
132 (download:[https://www.cottongen.org/data/download/genome\\_tetraploid/TM-1](https://www.cottongen.org/data/download/genome_tetraploid/TM-1)) as  
133 the reference genome, BWA 0.7.15 (Li *et al.*2009) was used to compare sequenced  
134 reads to the reference genome. Using GATK 4.0 (McKenna *et al.*2010) and SAMtools  
135 1.9 (Li *et al.*2009b) methods, SNPs and SNP marker intersections were identified to  
136 create the final reliable SNP marker dataset. SnpEff 4.0 (Cingolani *et al.*2012)  
137 software was used to obtain the locations of the variable sites (intergenic zones, gene

138 zones, or CDS zones) in the reference genome and the effects of the variations  
139 (synonymous mutations, nonsynonymous mutations, etc.).

#### 140 1.4 Analysis of cotton genetic evolution

##### 141 1.4.1 Phylogenetic analysis

142 A phylogenetic tree is used to indicate the evolutionary relationships between species  
143 that are considered to have a common ancestor and to describe the classification and  
144 evolutionary relationships between species. In the analysis, according to the genetic  
145 data of the population, the distance of the genetic relationship between the materials  
146 was inferred, a distance matrix was constructed, and a phylogenetic tree was created  
147 based on the distance matrix. MEGAX 7.0.14 software was used to construct the  
148 phylogenetic tree of each sample based on the neighbor-joining method and the  
149 p-distance model, and bootstrapping was repeated 1,000 times.

##### 150 1.4.2 PCA

151 Principal component analysis is a statistical method that is performed by transforming  
152 a set of correlated variables into a set of linearly uncorrelated variables; the  
153 transformed set of variables is called the principal components. In population genetics,  
154 different materials are clustered into different subgroups based on the degree of SNP  
155 differentiation (or degree of divergence) between materials, and the results can be  
156 used for mutual verification with the results of other clustering methods. Based on the  
157 SNPs identified, EIGENSOFT 7.2.1 (Alkes *et al.*2006) software was used to perform  
158 principal component analysis to cluster the samples. Through PCA, we could  
159 determine which samples were relatively closely related and which samples were  
160 relatively distantly related, facilitating evolutionary analysis.

##### 161 1.4.3 Analysis of genetic structure

162 Population structure, also known as group stratification, refers to the existence of  
163 subgroups with different gene frequencies in the studied group. The materials in the  
164 same subgroup are closely related, and the subgroups are relatively distantly related.

165 Group structure analysis can reveal the number of ancestors of the studied group and  
166 the blood origin of each sample. The group cluster analysis method is currently  
167 widely used, as it helps to understand the evolution of materials. Based on the SNPs  
168 identified, ADMIXTURE V250 (Alexander *et al.* 2009) software was used to analyze  
169 the group structure of the research materials. For the research group, the number of  
170 subgroups (K value) was preset to 1-20 for clustering, the clustering results were  
171 cross-validated, and the optimal number of clusters was determined according to the  
172 lowest cross-validation error rate.

#### 173 1.4.4 Genetic relationship analysis

174 Estimation of the affinity (relative kinship) between natural groups can be performed  
175 using SPAGeDi 1.3 (Hardy *et al.* 2002) software. The kinship itself is the relative  
176 value that defines the genetic similarity between two specific materials and that  
177 between any material and itself, so when the kinship value between the two materials  
178 is less than 0, it is directly defined as 0.

#### 179 1.4.5 Analysis of genetic diversity

180 Population genetic parameters and the population index (Fst) were calculated using  
181 VCFtools software (<https://vcftools.github.io/index.html>). According to Wright, when  
182 the group differentiation index (Fst) equals 0 or 1, there is no differentiation between  
183 subgroups or complete differentiation between subgroups, respectively. However,  
184 values of  $0 < F_{st} < 0.05$ ,  $0.05 \leq F_{ST} < 0.15$ ,  $0.15 \leq F_{ST} < 0.25$ , or  $0.25 \leq F_{ST} < 1$   
185 indicate weak, moderate, strong or very strong genetic differentiation between  
186 subgroups, respectively.

## 187 2 Results and analysis

### 188 2.1 Genotype analysis of the cotton population

189 In the experiment, the digestion efficiency of HaeIII+SspI-HF® was 97.02%, and a  
190 total of 2,161.76 Mb reads were obtained. A total of 1,313,331 SNPs were obtained

191 from the population through comparison with the cotton genome. The average Q30 of  
192 the sequences was 96.87%, and the average GC content was 36.50%. The Nipponbare  
193 rice sequencing used to evaluate the accuracy of the experimental database yielded  
194 2.12 Mb reads of data(Appendix 2).

195 Plotting the distribution of SNPs on chromosomes revealed that SNPs were present in  
196 high density at both ends of the chromosomes and at low density in the  
197 juxtacentromeric region. The densities of SNPs on chromosomes A07, A13, D01, D05,  
198 and D09 were relatively high (Figure 1). Chromosome ends are enriched in functional  
199 genes, and the mid-centromere and near-centromere regions are mostly repetitive  
200 sequences. The density distribution of SNPs on chromosomes was in accordance with  
201 that expected.

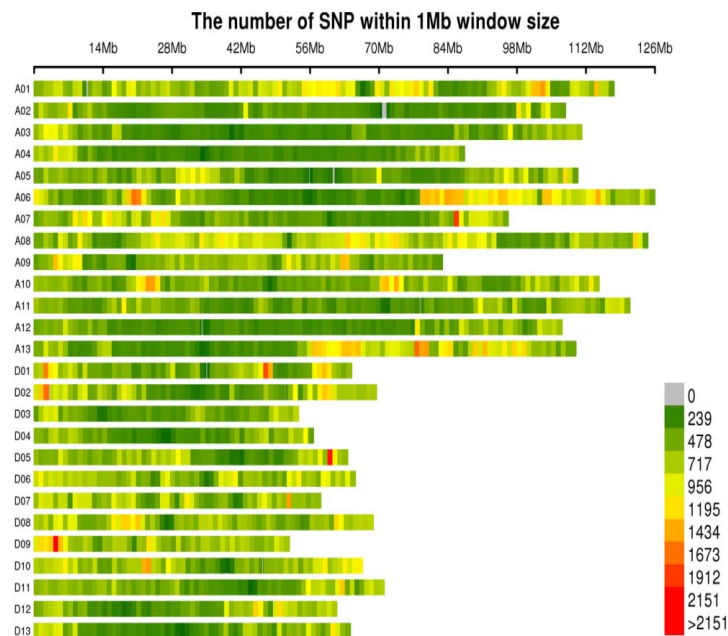

202

203 **Figure 1** Distribution of SNPs on chromosomes. The abscissa is the length of the  
204 chromosome. Each band represents a chromosome. The genome is divided according  
205 to the size of 1Mb. The more SNP markers in each window, the darker the color, and  
206 the fewer SNP markers, and the lighter the color. ; The darker the color in the figure is  
207 the area where the SNP markers are concentrated.

208 2.2 Genetic evolutionary analysis



209 Phylogenetic trees were drawn based on the SNP markers, where most of the  
210 materials on the branches were from the inland cotton area of northwestern China, but  
211 they also contained materials from Central Asia(Figure 2).

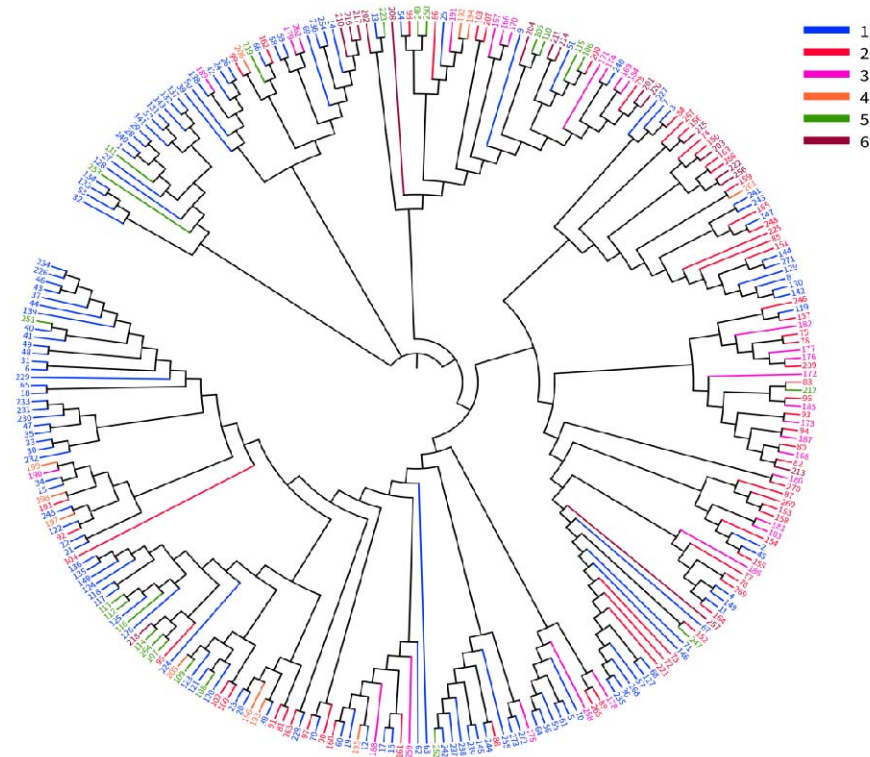

212

213 **Figure 2** Phylogenetic tree.Each branch in the picture is a sample, and each source  
214 has a color. 1: Northwest Inland, 2: Yellow River Basin, 3: Yangtze River Basin, 4:  
215 Extra-early Cotton Area, 5: Central Asia, 6: United States and other sources.

216 Based on principal component analysis of 1,313,331 SNP molecular markers  
217 from the population, the first three components explained 11.15%, 8.26%, and 6.47%  
218 of the variation, respectively. The results of the first three components were used to  
219 draw a PCA plot in the R environment, which is shown in Figure 3. The cotton  
220 population showed a certain distribution gap, but most varieties were clustered  
221 together, with no obvious differences among the 273 cotton materials. In terms of  
222 group stratification, the varieties from the United States and Central Asia were close  
223 to the early Chinese land cotton varieties, which corresponds to the early introduction

224 of Chinese land cotton varieties mainly from the United States and the Soviet Union  
225 and breeding with the introduced materials as the parents.

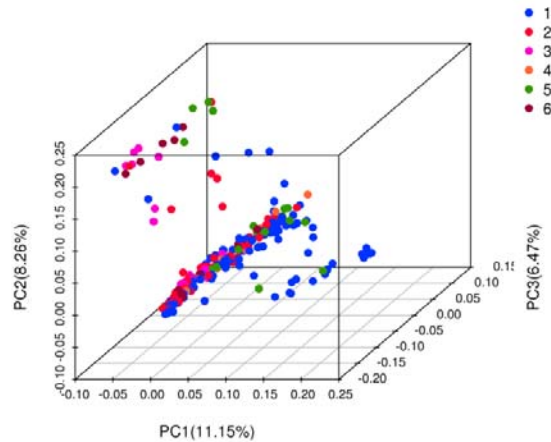

226

227 **Figure 3** PCA three-dimensional clustering map. In the figure, the samples are  
228 gathered into three dimensions by PCA analysis, PC1 represents the first principal  
229 component, PC2 represents the second principal component; PC3 represents the third  
230 principal component. A point represents a sample, and a color represents a grouping 1:  
231 Northwest Inland, 2: Yellow River Basin, 3: Yangtze River Basin, 4: Extra-early  
232 Cotton Area, 5: Central Asia, 6: United States and other sources.

233 For the group genetic structure analysis of the 273 cotton varieties through  
234 1,313,331 SNP molecular markers, the K value range for the number of subgroups  
235 was set to 1-20, and the cross-validation error (CV error) was calculated under the  
236 different K values. As shown in Figure 4, when K increased from 1 to 6, the CV error  
237 value decreased rapidly; when K increased from 6 to 11, the CV error value gradually  
238 decreased and tended to flatten; when K increased from 11 to 16, the CV error value  
239 showed a volatile, downward trend; and when K was greater than 16, the CV error  
240 value increased to a certain extent. Thus, when K was equal to 16, the CV error value  
241 is the smallest, and the 273 cotton variety groups could therefore be divided into 16  
242 subgroups :Subgroup 1~Subgroup 16(Figure 4).

243 Depending on the Q value, each individual in the 16 subgroups was classified  
244 into the maximum-Q value subgroup (Table 1). The 16 subgroups were 9, 16, 52, 4,

245 10, 13, 8, 30, 13, 9, 26, 18, 8, 31, 5, and 21. Group structure analysis is more  
 246 consistent with PCA and systematic evolutionary tree analysis, with independent tests  
 247 on the subgroups and the source of the materials. The results of these analyses showed  
 248 that the division of the subgroups was significantly correlated with the material source,  
 249 indicating that the genetic background of the resources was relatively homogeneous.

250 **Table 1** Specific species grouping

| Grouping | Variety number                                                                                                                                                                                 | Quantity |
|----------|------------------------------------------------------------------------------------------------------------------------------------------------------------------------------------------------|----------|
| Q1       | 1,29,37,43,44,46,139,226,234                                                                                                                                                                   | 9        |
| Q2       | 2,36,57,67,68,71,72,73,127,146,152,221,235,247,257,268                                                                                                                                         | 16       |
| Q3       | 10,13,25,58,59,63,66,75,78,80,82,83,87,89,94,96,99,119,153,154,155,157,158,162,168,172,173,176,177,178,179,180,181,182,183,185,186,187,206,209,212,213,219,223,246,258,259,260,262,265,267,270 | 52       |
| Q4       | 32,53,133,134                                                                                                                                                                                  | 4        |
| Q5       | 4,8,11,76,77,130,142,149,164,269                                                                                                                                                               | 10       |
| Q6       | 5,7,27,28,52,111,124,128,131,132,137,141,143                                                                                                                                                   | 13       |
| Q7       | 55,56,61,64,147,165,241,243                                                                                                                                                                    | 8        |
| Q8       | 6,15,31,34,65,81,86,91,92,97,100,101,102,104,108,109,113,116,120,121,122,123,163,190,198,199,205,230,231,233                                                                                   | 30       |
| Q9       | 14,24,26,39,42,69,138,189,210,216,217,236,254                                                                                                                                                  | 13       |
| Q10      | 18,40,41,48,49,229,232,250,251                                                                                                                                                                 | 9        |
| Q11      | 20,23,35,38,47,50,70,90,95,107,112,114,117,118,125,135,136,140,148,193,196,202,224,228,263,264                                                                                                 | 26       |
| Q12      | 12,16,17,19,21,22,30,33,60,62,88,160,161,188,191,195,197,245                                                                                                                                   | 18       |
| Q13      | 145,237,238,239,242,244,252,255                                                                                                                                                                | 8        |
| Q14      | 3,45,54,74,84,85,98,129,144,150,151,156,159,175,192,194,203,208,215,222,225,227,248,249,253,256,261,266,271,272,273                                                                            | 31       |

|     |                                                                                |    |
|-----|--------------------------------------------------------------------------------|----|
| Q15 | 106,115,126,200,218                                                            | 5  |
| Q16 | 9,51,79,93,103,105,110,166,167,169,170,171,174,184,201,204,207,211,214,220,240 | 21 |

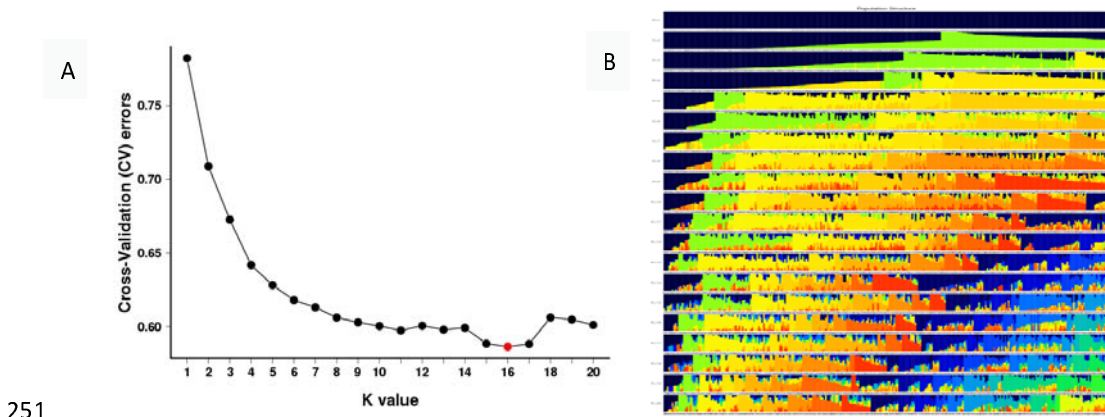

251

252 **Figure 4** Cross-validation error rate of each K value of Admixture.(A)

253 Cross-validation error rate for each K value, Group structure analysis of 273 cotton  
254 materials, calculated CV error. at K of 1~20 . (B) Sample clustering results for each K  
255 value, Group structure at K =1-16 in which each individual is represented by lines of  
256 different colours, inferred which subgroup the breed belongs to from the proportion of  
257 color.

258 Kinship calculations were performed by TASSEL 3.0 software, and a heat map  
259 was generated in R (Figure 5), revealing that the 273 cotton varieties were closely  
260 related to most varieties (blue) and a few other materials (red).

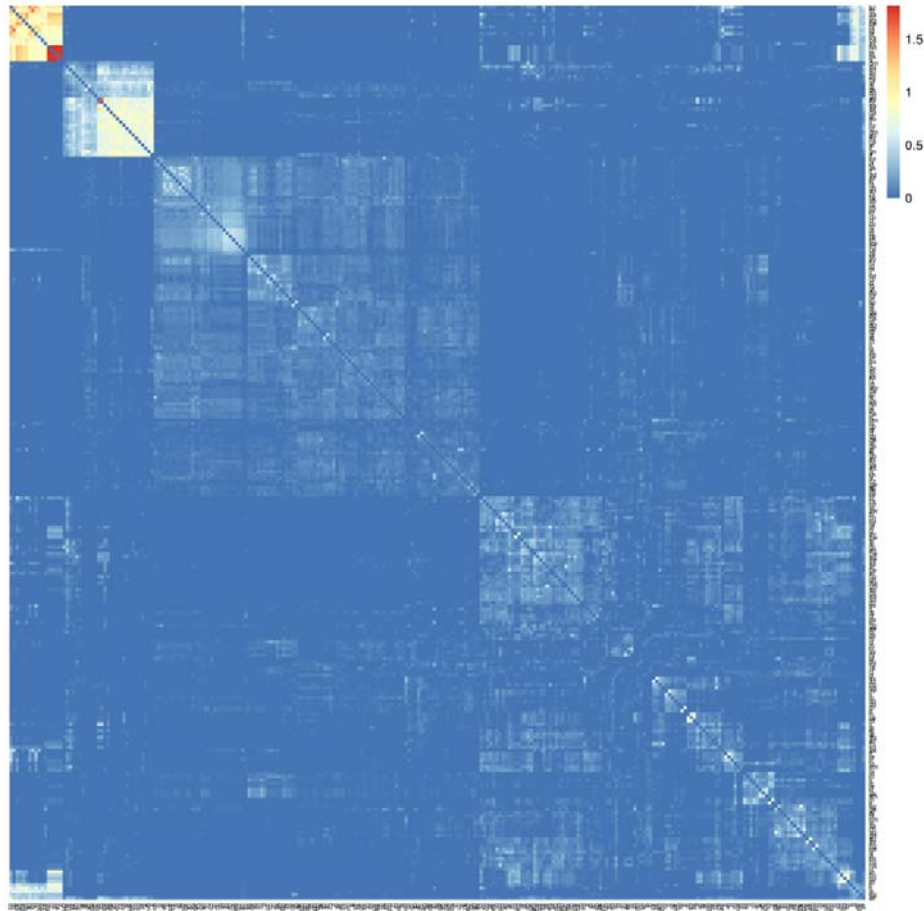

261

262 **Figure 5** Heat map distribution map of genetic relationship

263 2.3 Analysis of cotton genetic diversity

264 The experimental cotton group was divided into 6 subgroups according to source, and  
265 1,313,331 high-quality SNPs were evaluated to determine the genetic diversity of the  
266 experimental cotton group by calculating the diversity index, flavor index, and PIC.  
267 Through VCFtools calculations, the diversity index of the cotton population was  
268 determined to be 0.306, ranging between 0.314 for groups 1~6 and ~0.390, where  
269 group 2 had the lowest genetic diversity index (0.314) and group 4 had the highest  
270 (0.390) of the 6 groups. The aroma index (0.551) and PIC (0.296) were also  
271 determined. Group 4 had a relatively high genetic diversity level, but the overall  
272 genetic diversity level was still relatively low, which is consistent with the group  
273 structure analysis results(Table 2).

274 The population differentiation index ( $F_{st}$ ) was used to evaluate the degree of  
275 differentiation between cotton groups and revealed that the groups were all  
276 moderately or weakly genetically differentiated, with genetic differentiation indexes  
277 between groups ranging between 0.02368 and 0.10664 (Table 3). Among the groups,  
278 there was moderate differentiation between group 1 and groups 3, 4, and 5; there was  
279 moderate differentiation between group 2 and groups 3 and 4; there was moderate  
280 differentiation between groups 3, 4, 5 and 6; and the remaining groups were weakly  
281 equally divided. These results showed a moderate or weak degree of genetic  
282 differentiation among the groups; that is, the genetic relationship between the groups  
283 was relatively close. The genetic difference between group 3 and group 6 was the  
284 largest, and the difference between group 3 and group 5 was the smallest. This is  
285 related to the more effective promotion of selfing cotton varieties in the cotton  
286 planting area of the Yangtze River Basin. In addition, the genetic distance analysis of  
287 the cotton population used in this study showed that the genetic distance between  
288 these cotton germplasms ranged from 0.000332651~0.562664014. The average  
289 genetic distance was 0.25240429, and the genetic distances were quite different,  
290 indicating that there were large differences in gene exchange between subgroups. The  
291 genetic distance between Wanmian 8407 and Keyuan 1 was the closest (0.000332651),  
292 while that between Xinluzhong 4 and Ekangmian 33 was the longest (0.562664014).

293 **Table 2** Statistics of genetic diversity

---

| Grouping | Diversity index ( $H$ ) | Shannon Index( $I$ ) | PIC         |
|----------|-------------------------|----------------------|-------------|
| 1        | 0.340962993             | 0.513301254          | 0.273711106 |
| 2        | 0.313688456             | 0.478088588          | 0.253233419 |
| 3        | 0.336734808             | 0.503163381          | 0.268215802 |
| 4        | 0.390081647             | 0.551293397          | 0.295768827 |
| 5        | 0.347723988             | 0.513940149          | 0.274302057 |

---

|         |             |             |             |
|---------|-------------|-------------|-------------|
| 6       | 0.355438627 | 0.518915162 | 0.277185405 |
| overall | 0.306138549 | 0.470906956 | 0.248870833 |

294 **Table 3** Statistics of population differentiation index

|   | 1       | 2       | 3       | 4       | 5       | 6       |
|---|---------|---------|---------|---------|---------|---------|
| 1 | 0.00000 |         |         |         |         |         |
| 2 | 0.02655 | 0.00000 |         |         |         |         |
| 3 | 0.09008 | 0.06711 | 0.00000 |         |         |         |
| 4 | 0.06625 | 0.06038 | 0.02638 | 0.00000 |         |         |
| 5 | 0.06801 | 0.03543 | 0.02368 | 0.03440 | 0.00000 |         |
| 6 | 0.04768 | 0.04231 | 0.10664 | 0.09887 | 0.07326 | 0.00000 |

295

## 296 3 Discussion

### 297 3.1 Analysis of cotton population structure

298 Studies have shown that there will be false associations between genotypes and traits,  
299 which may be caused by population structure and an uneven distribution of alleles  
300 (Wu *et al.* 2019). To eliminate false positives in association analysis, we need to  
301 analyze the group structure of a test group first and control for that group structure.  
302 This study used ADMIXTURE software to analyze the population structure of 273  
303 natural populations of cotton varieties at home and abroad. The results showed that  
304 when K=16, the CV error value was the smallest. Therefore, the 273 cotton  
305 germplasms were divided into 16 subgroups. According to the grouping results, in the  
306 same subgroup, most varieties were genetically related. The analysis results showed  
307 that some varieties with different origins were of one type, which may have been  
308 caused by crossover between varieties and environmental factors, but most varieties  
309 with the same origin and with similar genetic background information could be better  
310 classified. For subgroups, the results of population structure analysis were more in

311 line with the evolutionary trends of the genetic background during breeding.  
312 According to the different origins of the experimental cotton materials, they were  
313 divided into 6 groups. The population differentiation indexes ranged between 0.02368  
314 and 0.10664, and the population differentiation indexes between most groups were  
315 less than 0.07, indicating that the cotton population has moderately weak genetic  
316 differentiation. In the later period, the genetic relationship of varieties cultivated  
317 through continuous introduction and germplasm innovation gradually increased.  
318 China is not the origin of upland cotton. Previous studies have shown that since the  
319 introduction of tetraploid cotton to China, Daizimian 15 has been the most widely  
320 planted variety in China. In 1958 alone, more than 3.5 million hectares were planted,  
321 accounting for approximately 50% of the country's cotton planting area that year.  
322 More than 100 varieties have been directly selected from Daizimian 15. In addition,  
323 there are quite a few varieties that are crossed with Daizimian 15. Principal  
324 component analysis and population structure analysis have also shown that the genetic  
325 range of cotton is relatively narrow, and most cotton varieties are derived from the  
326 same ancestor, Stormproof. The group differentiation of soybeans is driven by  
327 differences in geographical locations. Conversely, the formation of populations during  
328 the process of cotton breeding was mainly due to different ancestors, which is similar  
329 to the situation in wheat (Ye.2011;Mei.2012). There were some differences among the  
330 33 local upland cotton varieties bred in southern Xinjiang collected by the Economic  
331 Crop Research Institute of the Xinjiang Academy of Agricultural Sciences, but the  
332 overall differences were not large; in cultivated cotton from other regions, the  
333 population differentiation indexes were between 0.01 and 0.05 (Ai *et al.*2010). This  
334 shows that cotton collected in China has a low degree of genetic differentiation. In  
335 comparison, the population differentiation index of cotton germplasm in this study is  
336 similar to that of cotton germplasm collected in China, and varieties from different  
337 ecological regions show obvious mixed characteristics.

338 3.2 Analysis of cotton genetic diversity



339 The sum of genetic information carried by all organisms is defined as genetic diversity,  
340 which can also be called species diversity. Genetic diversity is usually regarded as the  
341 sum of genetic variation among individuals within a species. In this study, the  
342 diversity index, Shannon index and PIC were calculated to evaluate the genetic  
343 diversity of the cotton population. Previous studies such as that of Ai (2017)  
344 genotyped 288 upland cotton germplasms; the genetic diversity was 0.31, and the PIC  
345 was 0.25. Fang *et al.* (2013) detected an average PIC of 0.29 in 193 upland cotton  
346 varieties collected from 26 countries. These results indicate that the diversity of cotton  
347 collected in China is relatively low and that the degree of genetic differentiation is low.  
348 Moreover, the level of genetic differentiation between landraces and modern cultivars  
349 is low (Tyagi *et al.* 2014). According to the cotton SNP molecular marker  
350 development and genetic diversity comparison, the genetic diversity index of each  
351 subgroup in the cotton population in this study was between 0.314 and 0.390, and the  
352 overall genetic diversity index was 0.306, with a PIC of 0.249. Thus, the genetic  
353 diversity index of the cotton germplasm is consistent with that of the cotton  
354 germplasm collected in China. The largest genetic diversity was observed between  
355 varieties from the the US and extra-early cotton regions, and the largest differentiation  
356 index was between varieties from the the US and the Yangtze River Basin.  
357 High-quality cotton varieties can be selected and introduced to China to enrich the  
358 existing cotton germplasm resources. In addition, the genetic relationship between the  
359 samples will also have a certain impact on the results of the association analysis. In  
360 this study, the genetic distances between 273 cotton germplasms were analyzed, and  
361 the kinship value was used to infer the genetic relationships between different  
362 materials. The results showed that the average genetic distance of these cotton  
363 germplasms was 0.252. Part of the results indicated that some varieties with different  
364 origins were clustered into one category. Varieties with similar genetic backgrounds  
365 can be better clustered into one category, and the clustering results are more in line  
366 with the evolutionary trends of the genetic background of the varieties.

#### 367 **4 Conclusion**

368 Chinese cotton planting area is very large, but upland cotton was not domesticated in  
369 China. Upland cotton was first domesticated in the United States and was then  
370 introduced to China in the 1940s and 1950s. Among upland cotton varieties,  
371 Daizimian 15 and Sizimian 2B are the two most widely planted in China. On the basis  
372 of these two varieties, many modern cotton cultivars were bred by Chinese cotton  
373 breeders through genealogy and crossbreeding. After domestication and improvement,  
374 the yield of cotton was higher, the fiber quality was better, and the planting range was  
375 wider. Thus, these improved upland cotton cultivars can replace Asian cotton grown  
376 in China. The results of domestic and foreign studies have consistently shown that the  
377 genetic range of upland cotton varieties is narrow. The intraspecific genetic diversity  
378 was far lower than the interspecific differences (Liu *et al.* 2003; Curt *et al.* 1994).  
379 Using multiple methods to expand the genetic range of upland cotton varieties will be  
380 an important aspect of cotton germplasm resource innovation and breeding in the  
381 future. In this study, 1,313,331 SNP loci from the analyzed population were used to  
382 determine the population genetic structure of 273 domestic and foreign cotton  
383 germplasm resources. The results of the genetic diversity analysis revealed that the  
384 genetic diversity of the experimental cotton population was average; the results of the  
385 population genetic structure analysis showed that the population was divided into 16  
386 subgroups (K=16). In addition, this cotton population was less differentiated than and  
387 closely related to the domestically collected cotton germplasm. Genetic distance  
388 analysis revealed that Wanmian 8407 is the closest genetically to Keyuan 1 and that  
389 Xinluzhong 4 is the most genetically distant from Ekangmian 33. The results of the  
390 genetic diversity analysis showed that the greatest genetic diversity occurred between  
391 cultivars from the US and early cotton regions, and the largest differentiation index  
392 was observed between cultivars from the US and the Yangtze River Valley. This study  
393 will provide a basis for genome-wide association analysis for mining elite genes and  
394 obtaining elite cotton germplasms.

395 **Dota availability statements**

396 The raw sequence data reported in this paper have been deposited in the Genome  
397 Sequence Archive (Genomics, Proteomics & Bioinformatics 2017) in National  
398 Genomics Data Center (Nucleic Acids Res 2021), China National Center for  
399 Bioinformation / Beijing Institute of Genomics, Chinese Academy of Sciences,  
400 project number PRJCA 005438, under accession number CRAxxxxxx that are  
401 publicly accessible at <https://ngdc.cncb.ac.cn/gsa>.

402

403

#### 404 **Acknowledge**

405 We would like to thank Xinjiang Academy of Agricultural Sciences, China, for the  
406 cotton varieties provided for this study, BMK for the sequencing, and AJE for the  
407 English polishing. Thanks to all the people, units and enterprises who have provided  
408 help to this study.

#### 409 **Funding**

410 This work was supported by the National Natural Science Foundation of China (no.  
411 31760405 , U1903204).

412 Conflicts of interest : The authors have no conflicts of interest to declare.

#### 413 **Literature cited**

414 Alkes L Price, Nick J Patterson, et al. 2006. Principal components analysis corrects  
415 for stratification in genome-wide association studies. *Nature Genetics*. 38(8),  
416 904-909. doi:10.1038/ng1847.

417 Alexander D H, Novembre J, Lange K. 2009. Fast model-based estimation of ancestry  
418 in unrelated individuals. *Genome research*. 19(9): 1655-1664. doi:10.1101/gr.094  
419 052.109.

- 420 Ai X-T, Li X-Y, et al. 2010. Genetic Diversities of Upland Cotton Varieties in South  
421 Xinjiang. *Cotton Science*. 6:603-610.
- 422 Ai X-T. 2017. Genome-wide Association Analysis on Yield and Fiber Quality Traits  
423 in Upland Cotton. Xinjiang Agricultural University.
- 424 Beasley, J. O. 1940. The production of polyploids in gossypium. 31(1): 39-48.
- 425 Chen G, Du X-M. 2006. Genetic Diversity of Source Germplasm of Upland Cotton in  
426 China as Determined by SSR Marker Analysis. *Journal of Genetics and*  
427 *Genomics*. 33: 733-745.
- 428 Cingolani P, Platts A, Wang le L, et al. 2012. A program for annotating and predicting  
429 the effects of single nucleotide polymorphisms, SnpEff: SNPs in the genome of  
430 *Drosophila melanogaster* strain w1118; iso-2; iso-3., *Fly (Austin)*.  
431 *Apr-Jun;6(2):80-92*. doi:10.4161/fly.19695.
- 432 Curt.L. , Brubaker , Jonathan , F.Wendel , F Jonathan. 1994. Reevaluating the Origin  
433 of Domesticated Cotton (*Gossypium hirsutum*; Malvaceae) Using Nuclear  
434 Restriction Fragment Length Polymorphisms (RFLPs). *American Journal of*  
435 *Botany*. doi:10.2307/2445407.
- 436 Dong W. 2007. Genetic Diversity and SSR Abundance Analysis of Cotton Germplasm  
437 Resources. Master's Thesis of Chinese Academy of Agricultural Sciences.
- 438 Fryxell PA. 1979. The Natural History of the Cotton Tribe (Malvaceae, Tribe  
439 gossypieae). Texas A&M University Press. p 4-7.
- 440 Fryxell PA. 1992. A Revised Taxonomic Interpretation of *Gossypium* L. (Malvaceae).  
441 *Rheede*. 2:108-165.
- 442 Fang DD, Hinze LL, Percy RG, et al.2013.A microsatellite-based genome-wide analy  
443 sis of genetic diversity and linkage disequilibrium in Upland cotton (*Gossypium*

- 444       hirsutum L.) cultivars from major cotton- growing countries. *Euphytica*.  
445       191: 391~401. doi:10.1007/s10681-013-0886-2.
- 446       Grover CE, Gallagher JP, Jareczek JJ, Page JT, Udall JA, Gore MA, Wendel JF. 2015.  
447       Re-evaluating the Phylogeny of Allopolyploid *Gossypium* L. *Molecular*  
448       *Phylogenetics and Evolution*. 92:45-52. doi:10.1016/j.ympev.2015.05.023.
- 449       Gallagher JP, Grover CE, Rex K, Moran M, Wendel JF. 2017. A New Species of  
450       Cotton from Wake Atoll. *Gossypium stephensii* (Malvaceae). *Systematic Botany*.  
451       42:115-123. doi :10.1600/036364417x694593.
- 452       Gao W, Liu F, Li S-H, Wang K-B, et al. 2010. Genetic Diversity of Allotetraploid  
453       Cotton Based on SSR Markers. *ACTA AGRONOMICA SINICA*. 36(11):  
454       1902-1909.
- 455       Hardy O J, Vekemans X. 2002. SPAGeDi: a versatile computer program to analyse  
456       spatial genetic structure at the individual or population levels. *Molecular ecology*  
457       *notes*. 2(4): 618-620. doi:10.1046/j.1471-8286.2002.00305.x.
- 458       Kuang M, Yang W-H, Xu H-X. 2011. Construction of DNA Fingerprinting and  
459       Analysis of Genetic Diversity with SSR Markers for Cotton Major Cultivars in  
460       China. *China Agricultural Sciences*.44(1):20-27.doi:10.3864/j.issn.  
461       0578-1752.2011.01.003.
- 462       Kozich J J, Westcott S L, Baxter N T, et al. 2013. Development of a dual-index  
463       sequencing strategy and curation pipeline for analyzing amplicon sequence data  
464       on the MiSeqIllumina sequencing platform. *Applied and environmental*  
465       *microbiology*. 79(17): 5112-5120. doi:10.1128/aem.01043-13.
- 466       Liu Q. 2015. Identification of red star grass cotton-Australian cotton diploid and  
467       MSAP detection of genomic DNA methylation. Nanjing Agricultural University.

- 468 Liu W-X, Kong F-L, Guo Z-L, et al. 2003. Molecular Marker Analysis of Cotton Seed  
469 Inheritance in China since the Founding of the People's Republic of China.  
470 Journal of Genetics and Genomics. 30(6):560-570.
- 471 Li H, Durbin R. 2009. Fast and accurate short read alignment with Burrows-Wheeler  
472 transform. Bioinformatics. 25(14):1754-1760.doi:10.1093/bioinformatics/btp324.
- 473 Li H, Handsaker B, Wysoker A, et al. 2009. The Sequence Alignment/Map Format  
474 andSAMtools.Bioinformatic.25(16):2078-2079.doi:10.1093/bioinformatics  
475 /btp352.
- 476 Multanid S,Lyon B R.1995. Genetie Finger Printing of Australian Cotton Culivars w  
477 ith RAPD Markers. Genome. 38: 1005 - 1008. doi:10.1139/g95-132.
- 478 McKenna A, Hanna M, Banks E, et al. 2010. The Genome Analysis Toolkit: a  
479 MapReduce framework for analyzing next-generation DNA sequencing data.  
480 Genome research. 20(9): 1297-1303. doi:10.1101/gr.107524.110.
- 481 Mei H-X. 2012. Genetic Diversity and Association Analysis of Main Breeding Target  
482 Traits in Uplang Cotton Cultivars of China. Nanjing Agricultural University.
- 483 Tyagi P, Gore M A, Bowman D T, et al. 2014. Genetic diversity and population struc  
484 ture in America Upland cotton (*Gossypium hirsutum* L.). Theoretical and Applie  
485 d Genetics. 127: 283~ 295. doi:10.1007/s00122-013-2217-3.
- 486 Wu Y-T, Zhang T-Z, Yin J-M. 2001. An Analysis about Genetic Basis of Cotton  
487 Cultivars in China since 1949 with Molecular Markers. Journal of Genetics and  
488 Genomics. 28 (11): 1040-1050.
- 489 Wu L-Y. 2012. Genetic Diversity Analysis of Sea-Island Cotton Germplasm  
490 Resources and Studies on Heterosis Utilisation between Upland Cotton and  
491 Island Cotton in the South China cotton region. Guangxi University.

492 Wu M, Wang N, Lin Z-X, et al. 2019. Development and evaluation of InDel markers  
493 in cotton based on whole-genome re-sequencing data. ACTA AGRONOMICA  
494 SINICA. 45(2).

495 Ye G-X. 2011. Genetic Analysis of cotton Cultivars Evolution in China. Nanjing  
496 Agricultural University.

497

498

499

500

501

502

503

504

505

506

507

508

509

510

511

512

513

514

515

516

517

518

519

520

521

522 **Appendix 1 273 cotton materials**

| Num<br>berin<br>g | Variety name       | Origin              | Num<br>berin<br>g | Variety name            | Origin                   | Num<br>berin<br>g | Variety name | Origin                 |
|-------------------|--------------------|---------------------|-------------------|-------------------------|--------------------------|-------------------|--------------|------------------------|
| 1                 | Xinlu early 1      | Inland<br>Northwest | 92                | Jin Cotton 6            | Yellow<br>River<br>Basin | 183               | Su Mian 12   | Yangtze<br>River Basin |
| 2                 | Xinlu<br>Morning 2 | Inland<br>Northwest | 93                | Shaanxi Cotton<br>No. 9 | Yellow<br>River<br>Basin | 184               | Su Mian 15   | Yangtze<br>River Basin |
| 3                 | Xinlu early 3      | Inland<br>Northwest | 94                | Shaanxi Cotton<br>No. 6 | Yellow<br>River<br>Basin | 185               | Xuzhou 514   | Yangtze<br>River Basin |
| 4                 | Xinlu<br>Morning 4 | Inland<br>Northwest | 95                | Shaan 63-1              | Yellow<br>River<br>Basin | 186               | Ganmian 10   | Yangtze<br>River Basin |
| 5                 | Xinlu<br>Morning 5 | Inland<br>Northwest | 96                | Shaan 5245              | Yellow<br>River          | 187               | Ganmian 17   | Yangtze<br>River Basin |



|    |                   |                  |     |                      |                    |     |                   |                                |
|----|-------------------|------------------|-----|----------------------|--------------------|-----|-------------------|--------------------------------|
|    |                   |                  |     |                      | Basin              |     |                   |                                |
| 6  | Xinlu early 7     | Inland Northwest | 97  | Shaan 401            | Yellow River Basin | 188 | Chuan 169-6       | Yangtze River Basin            |
| 7  | Xinlu Morning 8   | Inland Northwest | 98  | Shaan 2812           | Yellow River Basin | 189 | Chuan 73-27       | Yangtze River Basin            |
| 8  | Xinlu Morning 9   | Inland Northwest | 99  | Shaanxi 2754         | Yellow River Basin | 190 | Sichuan cotton 65 | Yangtze River Basin            |
| 9  | New Land 10 a.m   | Inland Northwest | 100 | Sprinkle cotton No.2 | Inland Northwest   | 191 | Yu cotton 1       | Yangtze River Basin            |
| 10 | New Land 11 a.m   | Inland Northwest | 101 | Cotton No.1          | Yellow River Basin | 192 | Liao cotton No.1  | Special precocious cotton area |
| 11 | New Land 12 early | Inland Northwest | 102 | Dun cotton 2         | Inland Northwest   | 193 | Liao cotton No.9  | Special precocious cotton area |
| 12 | New Land 13 early | Inland Northwest | 103 | Dunhuang 77-126-8    | Inland Northwest   | 194 | Liao cotton 16    | Special precocious cotton area |
| 13 | New Land 14       | Inland Northwest | 104 | Dunhuang 77-166      | Inland Northwest   | 195 | Liao no 1201      | Special precocious cotton area |
| 14 | New Land 16       | Inland Northwest | 105 | Tashkent 2           | Central Asia       | 196 | Liao 632-124      | Special precocious cotton area |
| 15 | Xinluzao 17       | Inland Northwest | 106 | 108 husbands         | Central Asia       | 197 | Liao 7334-7728    | Special precocious cotton area |
| 16 | Xinluzao 18       | Inland Northwest | 107 | KK-351               | Central Asia       | 198 | Nylon 1           | Special precocious             |

|    |                        |                     |     |               |                     |     |                         |                                      |
|----|------------------------|---------------------|-----|---------------|---------------------|-----|-------------------------|--------------------------------------|
|    |                        |                     |     |               |                     |     |                         | cotton area                          |
| 17 | Xinlu early<br>19      | Inland<br>Northwest | 108 | KK-1543       | Central<br>Asia     | 199 | Nylon 6                 | Special<br>precocious<br>cotton area |
| 18 | Xinluzao 21            | Inland<br>Northwest | 109 | KK-1047       | Central<br>Asia     | 200 | Big boll cotton         | Yellow River<br>Basin                |
| 19 | Xinluzao 22            | Inland<br>Northwest | 110 | Coker310      | Central<br>Asia     | 201 | Dai 4554                | United States                        |
| 20 | Xinluzao 23            | Inland<br>Northwest | 111 | C6524         | Central<br>Asia     | 202 | Dai 45A                 | United States                        |
| 21 | Xinlu<br>morning 24    | Inland<br>Northwest | 112 | C-4744        | Central<br>Asia     | 203 | Dai-80                  | United States                        |
| 22 | Xinlu Zao 25           | Inland<br>Northwest | 113 | C464          | Central<br>Asia     | 204 | Dai word cotton<br>15   | United States                        |
| 23 | New Land<br>27         | Inland<br>Northwest | 114 | C460          | Central<br>Asia     | 205 | Guan Nong 1             | Special<br>precocious<br>cotton area |
| 24 | New Land<br>29 early   | Inland<br>Northwest | 115 | C-405-555     | Central<br>Asia     | 206 | Montenegrin<br>Cotton 1 | Special<br>precocious<br>cotton area |
| 25 | New Land<br>30 morning | Inland<br>Northwest | 116 | C-3174        | Central<br>Asia     | 207 | Tess cotton             | Yellow River<br>Basin                |
| 26 | New Land<br>31         | Inland<br>Northwest | 117 | Bazhou 6501   | Inland<br>Northwest | 208 | McNair 210              | United States                        |
| 27 | New Land<br>32 early   | Inland<br>Northwest | 118 | Library T94-4 | Inland<br>Northwest | 209 | Coyuan 1                | Yellow River<br>Basin                |
| 28 | New Land<br>33         | Inland<br>Northwest | 119 | 8024 anti-    | Inland<br>Northwest | 210 | Cloth 3363              | United States                        |
| 29 | New Land<br>34         | Inland<br>Northwest | 120 | 65-201        | Inland<br>Northwest | 211 | Chad 3                  | Africa                               |

|    |                         |                     |     |               |                     |     |                        |                       |
|----|-------------------------|---------------------|-----|---------------|---------------------|-----|------------------------|-----------------------|
| 30 | New Land<br>35          | Inland<br>Northwest | 121 | Car 61-72     | Inland<br>Northwest | 212 | Turkmen land<br>cotton | Central Asia          |
| 31 | New Land<br>36          | Inland<br>Northwest | 122 | Sacar cotton  | Inland<br>Northwest | 213 | U.S. B-35              | United States         |
| 32 | New Land<br>37          | Inland<br>Northwest | 123 | Farming 5     | Inland<br>Northwest | 214 | African cotton<br>E-40 | Africa                |
| 33 | New Land<br>38          | Inland<br>Northwest | 124 | Moyu 11       | Inland<br>Northwest | 215 | Australia V21-757      | Australia             |
| 34 | New Land is<br>39 early | Inland<br>Northwest | 125 | New Land 202  | Inland<br>Northwest | 216 | Miscot7803-52          | United States         |
| 35 | New Land<br>40 morning  | Inland<br>Northwest | 126 | New Land 201  | Inland<br>Northwest | 217 | T-word cotton 16       | United States         |
| 36 | New Land<br>41          | Inland<br>Northwest | 127 | New Land 71   | Inland<br>Northwest | 218 | Aussie Siv2            | Australia             |
| 37 | New Land<br>42          | Inland<br>Northwest | 128 | Xinluzhong 70 | Inland<br>Northwest | 219 | Division 6524          | Central Asia          |
| 38 | Xinluzao 45             | Inland<br>Northwest | 129 | Xinluzhong 69 | Inland<br>Northwest | 220 | Thin floc H10          | United States         |
| 39 | Xinluzao 47             | Inland<br>Northwest | 130 | Xinluzhong 65 | Inland<br>Northwest | 221 | Yinmian 1              | Yellow River<br>Basin |
| 40 | Xinluzao 48             | Inland<br>Northwest | 131 | Xinluzhong 64 | Inland<br>Northwest | 222 | Us 28114-313           | United States         |
| 41 | Xinluzao 49             | Inland<br>Northwest | 132 | Xinluzhong 63 | Inland<br>Northwest | 223 | Filgan 175             | Central Asia          |
| 42 | Xinluzao 51             | Inland<br>Northwest | 133 | Xinluzhong 62 | Inland<br>Northwest | 224 | Xinluzao 44            | Inland<br>Northwest   |
| 43 | Xinluzao 52             | Inland<br>Northwest | 134 | Xinluzhong 61 | Inland<br>Northwest | 225 | Jizhong cotton<br>315  | Yellow River<br>Basin |
| 44 | Xinluzao 53             | Inland<br>Northwest | 135 | Xinluzhong 60 | Inland<br>Northwest | 226 | Xinluzao 43            | Inland<br>Northwest   |

|    |                   |                     |     |               |                     |     |                 |                     |
|----|-------------------|---------------------|-----|---------------|---------------------|-----|-----------------|---------------------|
| 45 | Xinluzao 57       | Inland<br>Northwest | 136 | Xinluzhong 59 | Inland<br>Northwest | 227 | J206-5          | Inland<br>Northwest |
| 46 | Xinluzao 58       | Inland<br>Northwest | 137 | Xinluzhong 58 | Inland<br>Northwest | 228 | Xinluzhong 82   | Inland<br>Northwest |
| 47 | Xinlu early<br>60 | Inland<br>Northwest | 138 | Xinluzhong 54 | Inland<br>Northwest | 229 | Xinluzao 82     | Inland<br>Northwest |
| 48 | Xinluzao 61       | Inland<br>Northwest | 139 | Xinluzhong 52 | Inland<br>Northwest | 230 | Xinlu early 80  | Inland<br>Northwest |
| 49 | Xinluzao 62       | Inland<br>Northwest | 140 | Xinluzhong 50 | Inland<br>Northwest | 231 | Xinluzao 77     | Inland<br>Northwest |
| 50 | Xinluzao 63       | Inland<br>Northwest | 141 | Xinluzhong 48 | Inland<br>Northwest | 232 | Xinluzao 73     | Inland<br>Northwest |
| 51 | Xinluzhong<br>2   | Inland<br>Northwest | 142 | Xinluzhong 47 | Inland<br>Northwest | 233 | Xinluzao 65     | Inland<br>Northwest |
| 52 | Xinluzhong<br>4   | Inland<br>Northwest | 143 | Xinluzhong 46 | Inland<br>Northwest | 234 | Xinluzao 55     | Inland<br>Northwest |
| 53 | Xinluzhong<br>5   | Inland<br>Northwest | 144 | Xinluzhong 45 | Inland<br>Northwest | 235 | Luyan cotton 27 | Inland<br>Northwest |
| 54 | Xinluzhong<br>6   | Inland<br>Northwest | 145 | Xinluzhong 42 | Inland<br>Northwest | 236 | 17N11           | Inland<br>Northwest |
| 55 | Xinluzhong<br>8   | Inland<br>Northwest | 146 | Xinluzhong 40 | Inland<br>Northwest | 237 | 17N10           | Inland<br>Northwest |
| 56 | Xinluzhong<br>9   | Inland<br>Northwest | 147 | Xinluzhong 39 | Inland<br>Northwest | 238 | 17N9            | Inland<br>Northwest |
| 57 | Xinluzhong<br>10  | Inland<br>Northwest | 148 | Xinluzhong 38 | Inland<br>Northwest | 239 | 17N8            | Inland<br>Northwest |
| 58 | Xinluzhong<br>14  | Inland<br>Northwest | 149 | Xinluzhong 36 | Inland<br>Northwest | 240 | 17N7            | Inland<br>Northwest |
| 59 | Xinluzhong<br>15  | Inland<br>Northwest | 150 | Lu 34         | Yellow<br>River     | 241 | 17N6            | Inland<br>Northwest |

|    |                  |                     |     |                              |                          |     |             |                       |
|----|------------------|---------------------|-----|------------------------------|--------------------------|-----|-------------|-----------------------|
|    |                  |                     |     |                              | Basin                    |     |             |                       |
| 60 | Xinluzhong<br>17 | Inland<br>Northwest | 151 | Lu Mianyan 36                | Yellow<br>River<br>Basin | 242 | 17N5        | Inland<br>Northwest   |
| 61 | Xinluzhong<br>18 | Inland<br>Northwest | 152 | Lu Mianyan 37                | Yellow<br>River<br>Basin | 243 | 17N3        | Inland<br>Northwest   |
| 62 | Xinluzhong<br>20 | Inland<br>Northwest | 153 | Yumian 11                    | Yellow<br>River<br>Basin | 244 | 17N2        | Inland<br>Northwest   |
| 63 | Xinluzhong<br>22 | Inland<br>Northwest | 154 | Yumian 15                    | Yellow<br>River<br>Basin | 245 | 17N1        | Inland<br>Northwest   |
| 64 | Xinluzhong<br>23 | Inland<br>Northwest | 155 | Yumian 17                    | Yellow<br>River<br>Basin | 246 | Xuzhou 142  | Yellow River<br>Basin |
| 65 | Xinluzhong<br>25 | Inland<br>Northwest | 156 | Yumian 19                    | Yellow<br>River<br>Basin | 247 | Soviet 8911 | Central Asia          |
| 66 | Xinluzhong<br>28 | Inland<br>Northwest | 157 | Zhongzhi Cotton<br>372       | Yellow<br>River<br>Basin | 248 | Kexin 001   | Yellow River<br>Basin |
| 67 | Xinluzhong<br>29 | Inland<br>Northwest | 158 | China Cotton<br>Institute 12 | Yellow<br>River<br>Basin | 249 | 150030      | Central Asia          |
| 68 | Xinluzhong<br>32 | Inland<br>Northwest | 159 | Middle cotton 16             | Yellow<br>River<br>Basin | 250 | 150028      | Central Asia          |
| 69 | Xinluzhong<br>33 | Inland<br>Northwest | 160 | China Cotton<br>Institute 17 | Yellow<br>River<br>Basin | 251 | 150022      | Central Asia          |
| 70 | Xinluzhong       | Inland              | 161 | Cotton 19                    | Yellow                   | 252 | 150021      | Central Asia          |

|    |               |                    |     |                           |                     |     |                 |                                |
|----|---------------|--------------------|-----|---------------------------|---------------------|-----|-----------------|--------------------------------|
|    | 34            | Northwest          |     |                           | River Basin         |     |                 |                                |
| 71 | Xinluzhong 35 | Inland Northwest   | 162 | Medium cotton 35          | Yellow River Basin  | 253 | 150019          | Central Asia                   |
| 72 | Lu 25         | Yellow River Basin | 163 | Cotton 41                 | Yellow River Basin  | 254 | 17N13           | Inland Northwest               |
| 73 | Lu 24         | Yellow River Basin | 164 | China Cotton Institute 43 | Yellow River Basin  | 255 | 17N12           | Inland Northwest               |
| 74 | Lu Mianyan 21 | Yellow River Basin | 165 | China Cotton Institute 60 | Yellow River Basin  | 256 | Miscott 8711    | United States                  |
| 75 | Lu 9          | Yellow River Basin | 166 | Hunan Cotton 11           | Yangtze River Basin | 257 | coker139        | United States                  |
| 76 | Lu 28         | Yellow River Basin | 167 | Ekang cotton 8            | Yangtze River Basin | 258 | Darmian 20      | Yangtze River Basin            |
| 77 | Lumian 17     | Yellow River Basin | 168 | Ekang cotton 10           | Yangtze River Basin | 259 | 19(Taihu)       | Yangtze River Basin            |
| 78 | Lumian 11     | Yellow River Basin | 169 | Ekang cotton 9            | Yangtze River Basin | 260 | Silver cotton 2 | Yellow River Basin             |
| 79 | Shi Yuan 321  | Yellow River Basin | 170 | Ekang cotton 33           | Yangtze River Basin | 261 | Liaomian 17     | Special precocious cotton area |
| 80 | Ji Mian 12    | Yellow River Basin | 171 | Emian 6                   | Yangtze River Basin | 262 | Hunan Cotton 10 | Yangtze River Basin            |

|    |                 |                    |     |                 |                     |     |                           |                    |
|----|-----------------|--------------------|-----|-----------------|---------------------|-----|---------------------------|--------------------|
| 81 | Ji Mian 11      | Yellow River Basin | 172 | Emian 10        | Yangtze River Basin | 263 | Zhong93001                | Yellow River Basin |
| 82 | Ji Mian 10      | Yellow River Basin | 173 | Emian 14        | Yangtze River Basin | 264 | Tashkent 6                | Central Asia       |
| 83 | Ji Mian 8       | Yellow River Basin | 174 | Emian 21        | Yangtze River Basin | 265 | Jinmian 29                | Yellow River Basin |
| 84 | Ji 168          | Yellow River Basin | 175 | Dongting 1      | Yangtze River Basin | 266 | China Cotton Institute 41 | Yellow River Basin |
| 85 | Ji 169          | Yellow River Basin | 176 | Wanmian 8407    | Yangtze River Basin | 267 | Medium 1132               | Yellow River Basin |
| 86 | Yun 93 Anti 354 | Yellow River Basin | 177 | Simian 2        | Yangtze River Basin | 268 | Huamian No. 1             | Inland Northwest   |
| 87 | Taiyuan 4       | Yellow River Basin | 178 | Simian 3        | Yangtze River Basin | 269 | Lumian 28                 | Yellow River Basin |
| 88 | Jin Cotton 31   | Yellow River Basin | 179 | Su Mian No. 1   | Yangtze River Basin | 270 | Lu Mianyan 27             | Yellow River Basin |
| 89 | Jin Cotton 19   | Yellow River Basin | 180 | Su Cotton 5(12) | Yangtze River Basin | 271 | Ji Mian 938               | Inland Northwest   |
| 90 | Jin Cotton 12   | Yellow River Basin | 181 | Su Mian 8       | Yangtze River Basin | 272 | 18N3                      | Inland Northwest   |
| 91 | Jin 11          | Yellow River       | 182 | Su Mian 9       | Yangtze River       | 273 | 18N4                      | Inland Northwest   |

---

Basin

Basin

523

524

525

526

527

528

529

530

531

532

533

534

535

536

537

538

539

540

541 **Appendix 2 Statistical Table of Sample SNP Information**

| Sample ID | SNP num | Integrity | Heter ratio | Sample ID | SNP num | Integrity | Heter ratio | Sample ID | SNP num | Integrity | Heter ratio |
|-----------|---------|-----------|-------------|-----------|---------|-----------|-------------|-----------|---------|-----------|-------------|
| 1         | 434,940 | 33.12%    | 1.98%       | 92        | 398,290 | 30.33%    | 6.63%       | 183       | 372,651 | 28.37%    | 4.04%       |
| 2         | 404,396 | 30.79%    | 1.75%       | 93        | 355,575 | 27.07%    | 9.44%       | 184       | 366,593 | 27.91%    | 1.53%       |
| 3         | 346,050 | 26.35%    | 1.69%       | 94        | 360,834 | 27.47%    | 2.69%       | 185       | 429,669 | 32.72%    | 1.81%       |
| 4         | 356,469 | 27.14%    | 1.88%       | 95        | 346,255 | 26.36%    | 7.03%       | 186       | 421,258 | 32.08%    | 4.02%       |



|    |         |        |       |     |         |        |       |     |         |        |       |
|----|---------|--------|-------|-----|---------|--------|-------|-----|---------|--------|-------|
| 5  | 387,519 | 29.51% | 1.82% | 96  | 402,924 | 30.68% | 4.91% | 187 | 384,530 | 29.28% | 2.90% |
| 6  | 395,712 | 30.13% | 3.31% | 97  | 400,893 | 30.52% | 6.37% | 188 | 382,419 | 29.12% | 2%    |
| 7  | 419,970 | 31.98% | 7.02% | 98  | 337,635 | 25.71% | 2.25% | 189 | 425,245 | 32.38% | 5.01% |
| 8  | 344,481 | 26.23% | 1.77% | 99  | 371,512 | 28.29% | 6.45% | 190 | 438,126 | 33.36% | 1.95% |
| 9  | 368,142 | 28.03% | 5.43% | 100 | 380,645 | 28.98% | 6.25% | 191 | 419,716 | 31.96% | 1.85% |
| 10 | 359,658 | 27.39% | 5.67% | 101 | 368,512 | 28.06% | 4.76% | 192 | 371,816 | 28.31% | 4.25% |
| 11 | 406,512 | 30.95% | 1.80% | 102 | 398,505 | 30.34% | 1.97% | 193 | 381,356 | 29.04% | 1.78% |
| 12 | 428,670 | 32.64% | 4.89% | 103 | 405,013 | 30.84% | 6.31% | 194 | 422,487 | 32.17% | 4.14% |
| 13 | 407,643 | 31.04% | 2.20% | 104 | 393,738 | 29.98% | 3.17% | 195 | 395,536 | 30.12% | 1.65% |
| 14 | 351,700 | 26.78% | 1.71% | 105 | 400,240 | 30.48% | 3.45% | 196 | 401,132 | 30.54% | 3.99% |
| 15 | 362,723 | 27.62% | 6.88% | 106 | 362,316 | 27.59% | 1.59% | 197 | 416,455 | 31.71% | 1.80% |
| 16 | 346,777 | 26.40% | 1.78% | 107 | 413,228 | 31.46% | 5%    | 198 | 342,310 | 26.06% | 8.13% |
| 17 | 425,605 | 32.41% | 1.78% | 108 | 405,613 | 30.88% | 4.54% | 199 | 371,032 | 28.25% | 4.48% |
| 18 | 406,179 | 30.93% | 1.76% | 109 | 359,280 | 27.36% | 3.98% | 200 | 399,414 | 30.41% | 2.07% |
| 19 | 358,576 | 27.30% | 1.62% | 110 | 371,168 | 28.26% | 2.74% | 201 | 440,223 | 33.52% | 3.33% |
| 20 | 389,335 | 29.64% | 5.48% | 111 | 398,243 | 30.32% | 1.82% | 202 | 444,033 | 33.81% | 3.98% |
| 21 | 417,327 | 31.78% | 1.72% | 112 | 398,822 | 30.37% | 2.45% | 203 | 424,247 | 32.30% | 1.76% |
| 22 | 433,431 | 33.00% | 1.83% | 113 | 420,994 | 32.06% | 7.32% | 204 | 404,954 | 30.83% | 1.66% |
| 23 | 417,988 | 31.83% | 5.37% | 114 | 398,432 | 30.34% | 3.36% | 205 | 430,315 | 32.77% | 2.27% |
| 24 | 366,549 | 27.91% | 1.74% | 115 | 364,089 | 27.72% | 1.80% | 206 | 412,801 | 31.43% | 1.82% |
| 25 | 366,817 | 27.93% | 1.68% | 116 | 345,660 | 26.32% | 2.18% | 207 | 389,324 | 29.64% | 7.63% |
| 26 | 411,664 | 31.35% | 1.65% | 117 | 371,624 | 28.30% | 1.68% | 208 | 384,411 | 29.27% | 1.65% |
| 27 | 402,222 | 30.63% | 3.76% | 118 | 386,846 | 29.46% | 6.56% | 209 | 413,280 | 31.47% | 1.52% |
| 28 | 397,127 | 30.24% | 1.75% | 119 | 330,553 | 25.17% | 3.22% | 210 | 378,617 | 28.83% | 1.67% |

|    |         |        |       |     |         |        |        |     |         |        |       |
|----|---------|--------|-------|-----|---------|--------|--------|-----|---------|--------|-------|
| 29 | 417,399 | 31.78% | 3.95% | 120 | 378,615 | 28.83% | 8.11%  | 211 | 423,858 | 32.27% | 1.98% |
| 30 | 348,578 | 26.54% | 5.54% | 121 | 380,015 | 28.94% | 3.46%  | 212 | 418,915 | 31.90% | 3.91% |
| 31 | 368,995 | 28.10% | 1.72% | 122 | 406,505 | 30.95% | 3.67%  | 213 | 393,101 | 29.93% | 1.53% |
| 32 | 394,821 | 30.06% | 1.71% | 123 | 408,282 | 31.09% | 5.86%  | 214 | 385,355 | 29.34% | 2.35% |
| 33 | 425,061 | 32.37% | 1.92% | 124 | 366,610 | 27.91% | 11.53% | 215 | 399,485 | 30.42% | 1.63% |
| 34 | 432,987 | 32.97% | 1.83% | 125 | 384,027 | 29.24% | 4.89%  | 216 | 443,888 | 33.80% | 2.26% |
| 35 | 429,669 | 32.72% | 1.78% | 126 | 400,793 | 30.52% | 5.55%  | 217 | 419,395 | 31.93% | 1.78% |
| 36 | 403,553 | 30.73% | 1.54% | 127 | 392,742 | 29.90% | 2.27%  | 218 | 384,402 | 29.27% | 1.59% |
| 37 | 425,604 | 32.41% | 2.05% | 128 | 408,697 | 31.12% | 2.09%  | 219 | 387,147 | 29.48% | 1.60% |
| 38 | 427,422 | 32.54% | 2.36% | 129 | 412,864 | 31.44% | 4.08%  | 220 | 402,916 | 30.68% | 1.52% |
| 39 | 403,257 | 30.70% | 1.85% | 130 | 362,779 | 27.62% | 1.52%  | 221 | 393,220 | 29.94% | 1.68% |
| 40 | 353,197 | 26.89% | 1.58% | 131 | 354,145 | 26.97% | 1.61%  | 222 | 424,769 | 32.34% | 3.63% |
| 41 | 421,349 | 32.08% | 4.34% | 132 | 381,547 | 29.05% | 1.56%  | 223 | 375,430 | 28.59% | 1.48% |
| 42 | 354,833 | 27.02% | 2.77% | 133 | 348,341 | 26.52% | 1.40%  | 224 | 431,499 | 32.86% | 2.49% |
| 43 | 413,331 | 31.47% | 1.71% | 134 | 384,133 | 29.25% | 2.05%  | 225 | 374,640 | 28.53% | 1.61% |
| 44 | 421,040 | 32.06% | 1.69% | 135 | 377,131 | 28.72% | 1.86%  | 226 | 434,324 | 33.07% | 1.86% |
| 45 | 393,095 | 29.93% | 1.65% | 136 | 359,475 | 27.37% | 2.20%  | 227 | 420,923 | 32.05% | 1.77% |
| 46 | 371,182 | 28.26% | 1.81% | 137 | 414,540 | 31.56% | 1.74%  | 228 | 423,923 | 32.28% | 1.72% |
| 47 | 404,044 | 30.76% | 1.66% | 138 | 375,535 | 28.59% | 1.65%  | 229 | 390,694 | 29.75% | 1.82% |
| 48 | 409,550 | 31.18% | 3.06% | 139 | 377,312 | 28.73% | 7.24%  | 230 | 387,537 | 29.51% | 4.50% |
| 49 | 427,854 | 32.58% | 1.88% | 140 | 379,476 | 28.89% | 6.35%  | 231 | 357,978 | 27.26% | 1.61% |
| 50 | 375,473 | 28.59% | 4.94% | 141 | 350,884 | 26.72% | 1.80%  | 232 | 434,914 | 33.12% | 3.50% |
| 51 | 380,337 | 28.96% | 1.77% | 142 | 382,052 | 29.09% | 1.65%  | 233 | 432,206 | 32.91% | 5.68% |
| 52 | 421,356 | 32.08% | 1.78% | 143 | 408,789 | 31.13% | 2.12%  | 234 | 382,565 | 29.13% | 1.74% |

|    |         |        |       |     |         |        |       |     |         |        |       |
|----|---------|--------|-------|-----|---------|--------|-------|-----|---------|--------|-------|
| 53 | 403,303 | 30.71% | 3.28% | 144 | 382,242 | 29.10% | 1.88% | 235 | 383,969 | 29.24% | 1.55% |
| 54 | 418,254 | 31.85% | 5.45% | 145 | 380,524 | 28.97% | 6.02% | 236 | 403,449 | 30.72% | 1.61% |
| 55 | 385,327 | 29.34% | 1.68% | 146 | 417,955 | 31.82% | 4.24% | 237 | 433,385 | 33.00% | 5.49% |
| 56 | 424,481 | 32.32% | 1.95% | 147 | 350,340 | 26.68% | 1.52% | 238 | 360,771 | 27.47% | 3.74% |
| 57 | 377,631 | 28.75% | 4.39% | 148 | 407,595 | 31.04% | 2.38% | 239 | 419,835 | 31.97% | 1.98% |
| 58 | 415,037 | 31.60% | 3.20% | 149 | 382,006 | 29.09% | 1.53% | 240 | 383,080 | 29.17% | 1.50% |
| 59 | 418,553 | 31.87% | 1.75% | 150 | 376,016 | 28.63% | 4.67% | 241 | 364,755 | 27.77% | 1.62% |
| 60 | 405,432 | 30.87% | 1.57% | 151 | 371,336 | 28.27% | 4.18% | 242 | 307,038 | 23.38% | 1.49% |
| 61 | 377,245 | 28.72% | 2.08% | 152 | 373,996 | 28.48% | 1.50% | 243 | 397,387 | 30.26% | 1.53% |
| 62 | 378,597 | 28.83% | 8.20% | 153 | 340,280 | 25.91% | 1.53% | 244 | 425,251 | 32.38% | 1.74% |
| 63 | 370,030 | 28.17% | 4.12% | 154 | 386,129 | 29.40% | 6.10% | 245 | 386,212 | 29.41% | 1.62% |
| 64 | 400,675 | 30.51% | 2.18% | 155 | 365,701 | 27.85% | 1.31% | 246 | 360,541 | 27.45% | 1.49% |
| 65 | 426,418 | 32.47% | 5.97% | 156 | 381,831 | 29.07% | 1.59% | 247 | 411,842 | 31.36% | 1.59% |
| 66 | 375,172 | 28.57% | 3.84% | 157 | 375,794 | 28.61% | 1.51% | 248 | 405,759 | 30.90% | 1.67% |
| 67 | 373,745 | 28.46% | 3.84% | 158 | 359,096 | 27.34% | 7.09% | 249 | 407,020 | 30.99% | 1.71% |
| 68 | 383,177 | 29.18% | 1.58% | 159 | 386,452 | 29.43% | 6.24% | 250 | 370,818 | 28.23% | 2.64% |
| 69 | 419,576 | 31.95% | 3.94% | 160 | 433,567 | 33.01% | 1.71% | 251 | 341,905 | 26.03% | 1.34% |
| 70 | 343,639 | 26.17% | 7.17% | 161 | 412,427 | 31.40% | 1.48% | 252 | 392,718 | 29.90% | 1.67% |
| 71 | 405,923 | 30.91% | 5.93% | 162 | 367,058 | 27.95% | 1.57% | 253 | 406,359 | 30.94% | 4.76% |
| 72 | 366,423 | 27.90% | 3.67% | 163 | 366,890 | 27.94% | 5.07% | 254 | 412,915 | 31.44% | 2.24% |
| 73 | 364,232 | 27.73% | 5.05% | 164 | 392,907 | 29.92% | 1.55% | 255 | 372,600 | 28.37% | 2.51% |
| 74 | 432,997 | 32.97% | 7.68% | 165 | 357,611 | 27.23% | 1.49% | 256 | 389,704 | 29.67% | 2.90% |
| 75 | 391,367 | 29.80% | 3.10% | 166 | 401,102 | 30.54% | 5.18% | 257 | 376,592 | 28.67% | 1.49% |
| 76 | 405,920 | 30.91% | 1.80% | 167 | 406,770 | 30.97% | 5.97% | 258 | 409,829 | 31.21% | 1.64% |

|    |         |        |       |     |         |        |       |     |         |        |       |
|----|---------|--------|-------|-----|---------|--------|-------|-----|---------|--------|-------|
| 77 | 359,165 | 27.35% | 1.65% | 168 | 416,563 | 31.72% | 3.03% | 259 | 386,984 | 29.47% | 1.49% |
| 78 | 440,316 | 33.53% | 3.35% | 169 | 431,051 | 32.82% | 4.15% | 260 | 416,587 | 31.72% | 3.17% |
| 79 | 399,286 | 30.40% | 1.68% | 170 | 416,577 | 31.72% | 1.90% | 261 | 360,637 | 27.46% | 7.74% |
| 80 | 395,603 | 30.12% | 4.81% | 171 | 355,087 | 27.04% | 5.14% | 262 | 354,067 | 26.96% | 1.47% |
| 81 | 408,905 | 31.13% | 1.89% | 172 | 349,741 | 26.63% | 6%    | 263 | 336,657 | 25.63% | 1.50% |
| 82 | 344,019 | 26.19% | 4.78% | 173 | 397,827 | 30.29% | 2.33% | 264 | 401,962 | 30.61% | 2.87% |
| 83 | 357,174 | 27.20% | 1.32% | 174 | 520,267 | 39.61% | 3.57% | 265 | 386,537 | 29.43% | 3.33% |
| 84 | 397,512 | 30.27% | 3.32% | 175 | 441,371 | 33.61% | 2.28% | 266 | 344,766 | 26.25% | 1.93% |
| 85 | 401,092 | 30.54% | 1.61% | 176 | 357,995 | 27.26% | 1.58% | 267 | 322,448 | 24.55% | 1.63% |
| 86 | 402,273 | 30.63% | 7.84% | 177 | 397,769 | 30.29% | 6.66% | 268 | 343,393 | 26.15% | 1.57% |
| 87 | 404,460 | 30.80% | 1.59% | 178 | 376,710 | 28.68% | 4.97% | 269 | 385,205 | 29.33% | 2.72% |
| 88 | 391,250 | 29.79% | 2.30% | 179 | 417,191 | 31.77% | 2.31% | 270 | 412,979 | 31.45% | 1.58% |
| 89 | 364,635 | 27.76% | 4.41% | 180 | 426,798 | 32.50% | 1.86% | 271 | 396,283 | 30.17% | 2.29% |
| 90 | 389,678 | 29.67% | 1.97% | 181 | 405,897 | 30.91% | 3.46% | 272 | 360,236 | 27.43% | 1.67% |
| 91 | 399,869 | 30.45% | 8.46% | 182 | 352,575 | 26.85% | 5.81% | 273 | 404,182 | 30.78% | 1.87% |

---

542 Note: Sample ID: sample number; SNP num: the number of SNP detected in the corresponding sample; Integrity:

543 the integrity of the SNP detected in the sample; Heter ratio: the heterozygosity rate of the SNP in the sample.

Population Structure

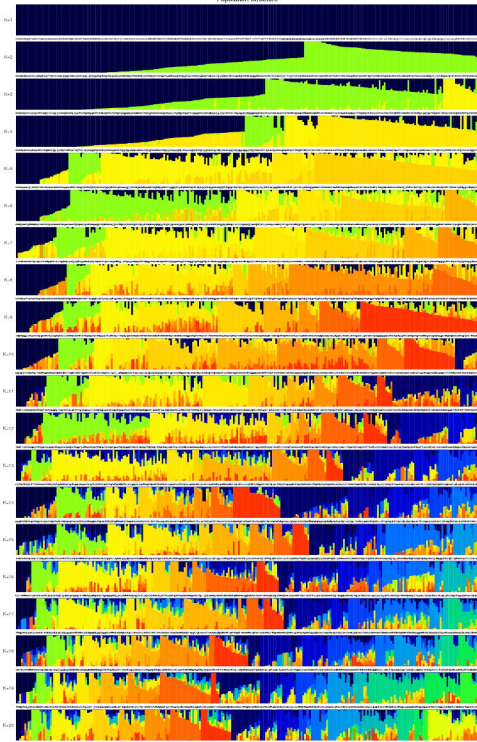

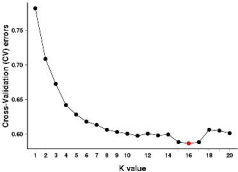

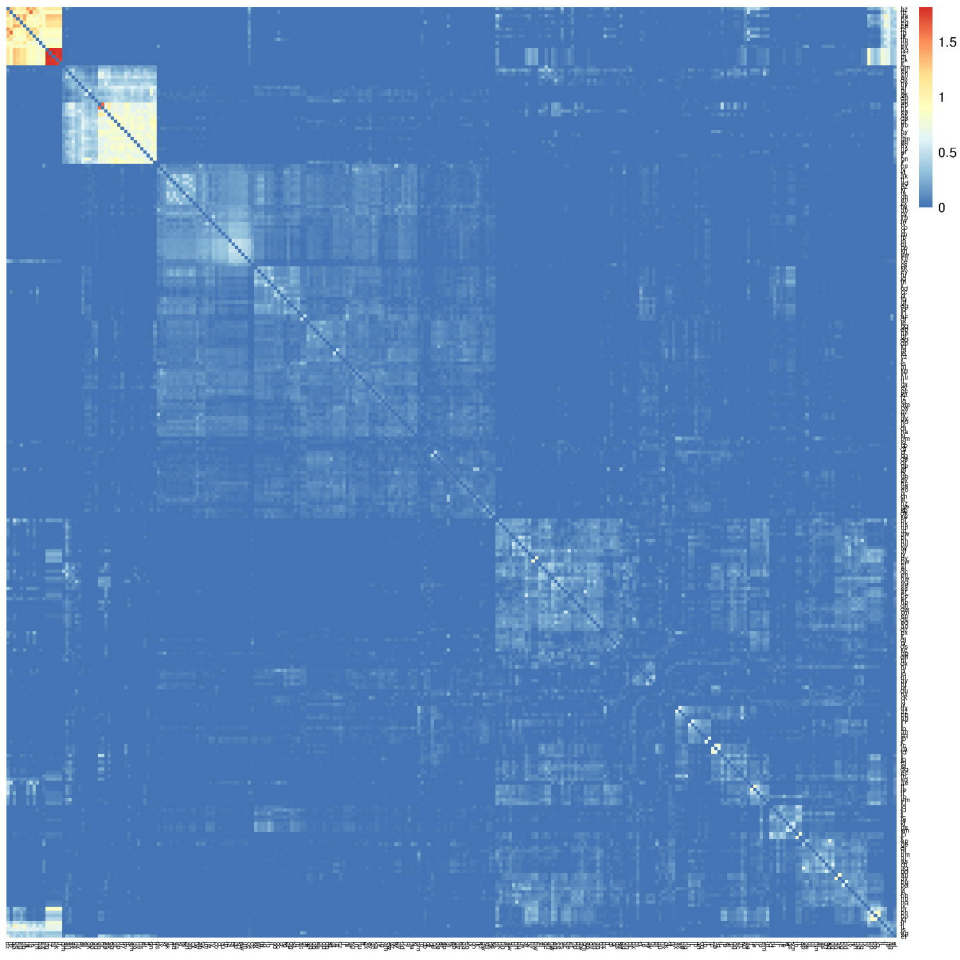

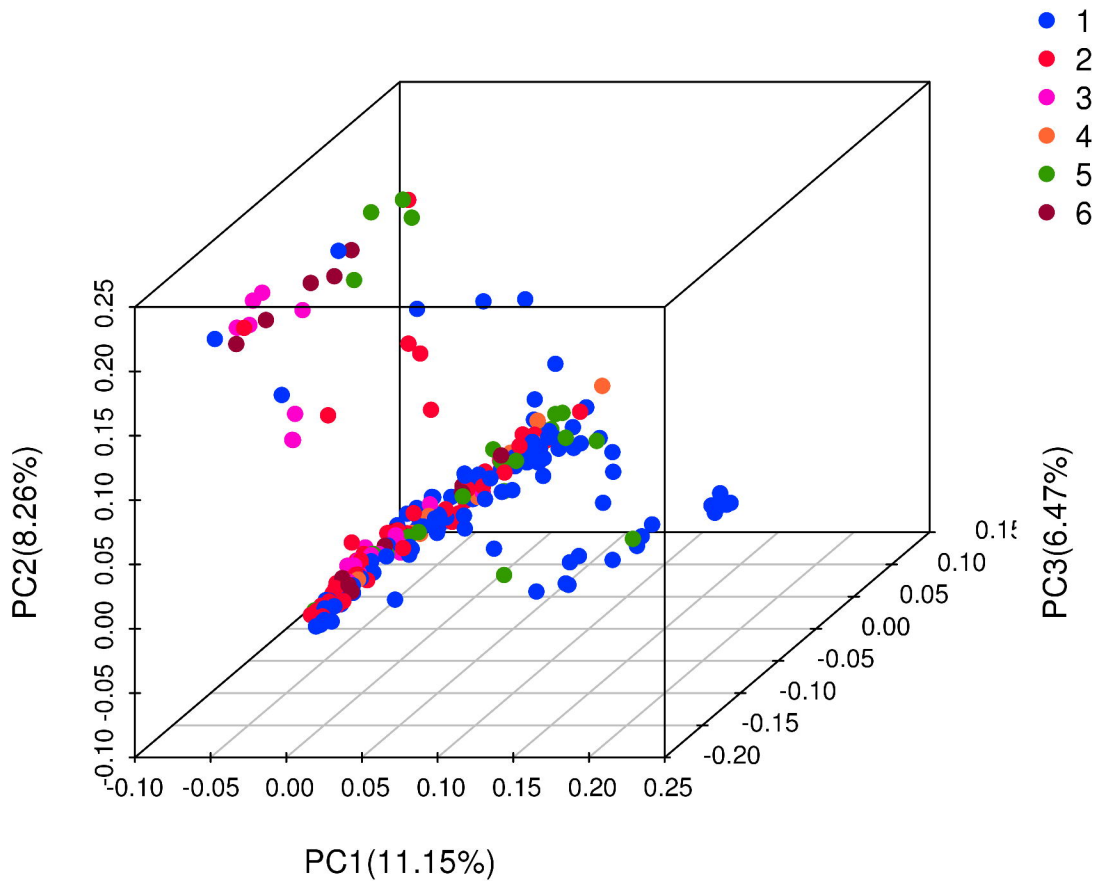



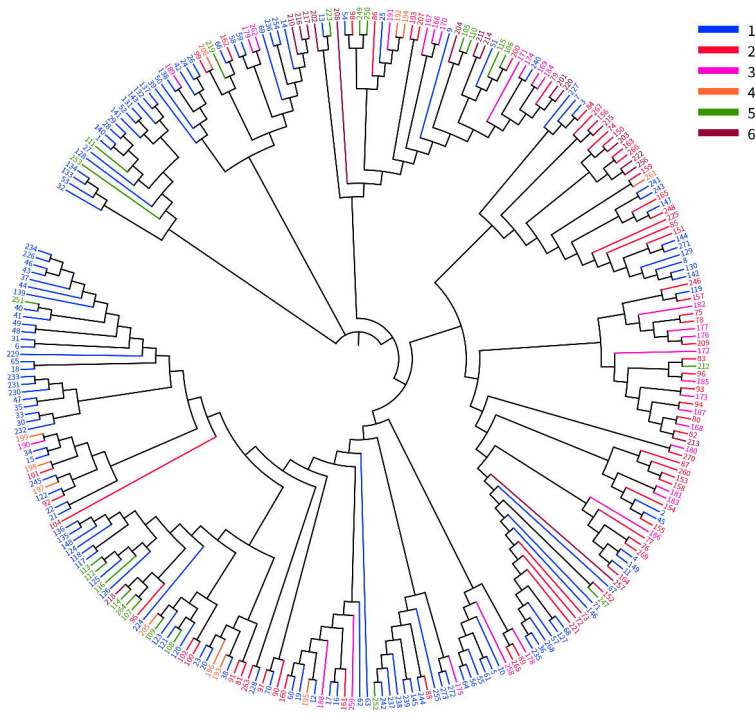

Source: https://www.biorxiv.org/content/10.1101/2021.06.11.448075v1.full.pdf
